# Supplementary material for: Studies on Antibacterial Activity and Diversity of Cultivable Actinobacteria Isolated from Mangrove Soil in Futian and Maoweihai of China
Source: Hindawi journal article supplement (doi:10.1155/2019/3476567), 2019-06-09
Supplement: f1 [file 3476567.f1.pdf]

## Supplementary Materials

Table S1: Composition of ten different media used for isolation of actinobacteria from mangrove soil in Futian and Maowehai.

| Media | Composition (1 L distilled water )                                                                                                                                                                                                                         |
|-------|------------------------------------------------------------------------------------------------------------------------------------------------------------------------------------------------------------------------------------------------------------|
| M1    | Starch 10.0 g, glucose 1.0 g, glycerinum 5.0 mL, trace salt solution 10.0 mL, agar 15.0 g, pH 6.0                                                                                                                                                          |
| M2    | Glucose 4.0 g, yeast extract 4.0 g, malt extract 10.0 g, agar 15.0 g, pH 6.0                                                                                                                                                                               |
| M3    | Glucose 10.0 g, peptone 5.0 g, tryptone 3.0 g, NaCl 5.0 g, agar 15.0 g, pH 6.0                                                                                                                                                                             |
| M4    | Yeast extract 5.0 g, L-asparagine 1.0 g, glycerinum 10.0 g, K <sub>2</sub> HPO <sub>4</sub> 1.0 g, KNO <sub>3</sub> 5.0 g, trace salt solution 1.0 mL, MgCl <sub>2</sub> 100.0 g, agar 15.0 g, pH 6.0                                                      |
| M5    | Trehalose 5.0 g, proline 1.0 g, (NH <sub>4</sub> ) <sub>2</sub> SO <sub>4</sub> 1.0 g, NaCl 1.0 g, CaCl <sub>2</sub> 2.0 g, K <sub>2</sub> HPO <sub>4</sub> 1.0 g, MgSO <sub>4</sub> ·7H <sub>2</sub> O 1.0 g, vitamin mixture 1.0 ml, agar 15.0 g, pH 6.0 |
| M6    | R2A agar (Difco), pH 6.0                                                                                                                                                                                                                                   |
| M7    | Glycerinum 15.0 g, L-tyrosine 0.5 g, L-asparagine 1.0 g, K <sub>2</sub> HPO <sub>4</sub> 0.5 g, MgSO <sub>4</sub> ·7H <sub>2</sub> O 0.5 g, NaCl 0.5 g, FeSO <sub>4</sub> ·7H <sub>2</sub> O 0.01 g, trace salt solution 1.0 ml, agar 15.0 g, pH 6.0       |
| M8    | Arginine 1.0 g, glycerinum 6.0 mL, vitamin mixture 1.0 ml, trace salt solution 1.0 ml, agar 15.0 g, pH 6.0                                                                                                                                                 |
| M9    | Starch 10.0 g, casein 0.3 g, KNO <sub>3</sub> 2.0 g, MgSO <sub>4</sub> ·7H <sub>2</sub> O 0.05 g, NaCl 30.0 g, K <sub>2</sub> HPO <sub>4</sub> 2.0 g, CaCO <sub>3</sub> 0.02 g, FeSO <sub>4</sub> ·7H <sub>2</sub> O 0.01 g, agar 15.0 g, pH 6.0           |
| M10   | L-Asparagine 1.0 g, glycerinum 10.0 g, K <sub>2</sub> HPO <sub>4</sub> 1.0 g, trace salt solution 1.0 ml, agar 15.0 g, pH 6.0                                                                                                                              |

Note: Trace salt solution: FeSO<sub>4</sub> ·7H<sub>2</sub>O 0.2 g, MnCl<sub>2</sub>·4H<sub>2</sub>O 0.01 g, ZnSO<sub>4</sub> ·7H<sub>2</sub>O 0.01 g, distilled water 100.0 ml.

Vitamin mixture: thiamine 0.1 g, pyridoxine 0.1 g, riboflavin 0.1g, niacin 0.1 g, biotin 0.1 g, distilled water 100.0 ml.

Table S2: Information on genera distribution of actinobacterial isolates from different samples.

| Genera                    | Samples |    |    |    |    |    |    |    |    |     |
|---------------------------|---------|----|----|----|----|----|----|----|----|-----|
|                           | S1      | S2 | S3 | S4 | S5 | S6 | S7 | S8 | S9 | S10 |
| <i>Streptomyces</i>       | 39      | 32 | 1  | 1  | 4  | -  | 9  | -  | -  | -   |
| <i>Kitasatospora</i>      | 4       | -  | -  | -  | 1  | -  | -  | -  | -  | -   |
| <i>Agrococcus</i>         | 2       | -  | -  | 1  | -  | 1  | -  | -  | 2  | -   |
| <i>Homoserinibacter</i>   | 1       | -  | -  | -  | -  | -  | -  | -  | -  | -   |
| <i>Agromyces</i>          | 2       | -  | -  | 10 | 31 | 8  | 16 | -  | 9  | 1   |
| <i>Curtobacterium</i>     | 19      | -  | -  | -  | -  | -  | 3  | -  | 1  | -   |
| <i>Glutamicibacter</i>    | 5       | -  | -  | -  | 1  | -  | -  | -  | -  | -   |
| <i>Leifsonia</i>          | -       | 1  | 10 | 1  | -  | -  | 1  | -  | -  | -   |
| <i>Microbacterium</i>     | 29      | 3  | 2  | 1  | 13 | 6  | 10 | -  | 9  | 5   |
| <i>Schumannella</i>       | 2       | -  | -  | -  | -  | -  | -  | -  | -  | -   |
| <i>Annibacterium</i>      | -       | -  | 1  | -  | -  | -  | -  | -  | -  | -   |
| <i>Frigoribacterium</i>   | -       | -  | -  | -  | -  | -  | -  | -  | -  | 1   |
| <i>Oerskovia</i>          | -       | 1  | -  | -  | -  | -  | -  | -  | -  | -   |
| <i>Brachybacterium</i>    | -       | 4  | -  | 1  | -  | 2  | -  | -  | -  | -   |
| <i>Arthrobacter</i>       | -       | 11 | -  | -  | 2  | 1  | 1  | -  | -  | -   |
| <i>Micrococcus</i>        | -       | -  | 1  | -  | -  | 1  | -  | -  | -  | -   |
| <i>Paenarthrobacter</i>   | 8       | -  | -  | -  | 3  | -  | -  | -  | -  | -   |
| <i>Kocuria</i>            | -       | 2  | -  | 3  | 3  | -  | -  | 2  | -  | -   |
| <i>Sinomonas</i>          | -       | 2  | 16 | 16 | 6  | -  | 2  | 1  | 3  | -   |
| <i>Janibacter</i>         | -       | -  | -  | -  | 1  | -  | -  | -  | -  | -   |
| <i>Arsenicococcus</i>     | -       | 1  | -  | -  | -  | 1  | -  | -  | -  | -   |
| <i>Brevibacterium</i>     | 2       | -  | -  | -  | -  | -  | -  | -  | -  | -   |
| <i>Cellulosimicrobium</i> | -       | -  | -  | -  | 1  | 1  | -  | -  | -  | -   |
| <i>Isoptericola</i>       | 1       | -  | -  | -  | 3  | -  | -  | -  | -  | -   |
| <i>Gordonia</i>           | -       | -  | -  | -  | -  | -  | 1  | -  | 1  | -   |
| <i>Nocardia</i>           | 5       | 5  | -  | 3  | -  | -  | 5  | -  | 2  | -   |
| <i>Rhodococcus</i>        | 14      | 12 | 2  | 1  | 9  | 1  | 11 | -  | 11 | 3   |
| <i>Mycobacterium</i>      | 2       | 8  | -  | 2  | 3  | 2  | 8  | -  | 3  | -   |
| <i>Nocardiopsis</i>       | -       | 1  | 2  | 3  | 1  | -  | -  | -  | -  | -   |
| <i>Streptosporangium</i>  | -       | 1  | -  | -  | -  | -  | -  | -  | -  | -   |
| <i>Actinomadura</i>       | -       | -  | -  | -  | -  | 1  | -  | -  | -  | -   |
| <i>Micromonospora</i>     | -       | 1  | -  | -  | -  | -  | -  | -  | 1  | -   |
| <i>Modestobacter</i>      | -       | -  | -  | -  | 1  | -  | -  | -  | -  | -   |
| <i>Pseudonocardia</i>     | 1       | -  | -  | -  | -  | -  | -  | -  | -  | -   |
| <i>Nocardioides</i>       | -       | 1  | -  | -  | -  | -  | -  | -  | -  | -   |
| <i>Aeromicrobium</i>      | -       | -  | -  | 3  | -  | -  | -  | -  | -  | -   |
| <i>Microlunatus</i>       | -       | 1  | -  | -  | -  | -  | -  | -  | -  | -   |
| <i>Mycolicibacterium</i>  | 2       | 1  | -  | -  | -  | -  | -  | -  | 1  | -   |
| <i>Pseudarthrobacter</i>  | -       | -  | -  | -  | -  | -  | 1  | -  | -  | -   |
| Total number of genera    | 17      | 18 | 8  | 13 | 16 | 11 | 12 | 2  | 11 | 4   |
| Total number of isolates  | 138     | 88 | 35 | 46 | 83 | 25 | 68 | 3  | 43 | 10  |

Note: -, no isolate

Table S3: Information on genera distribution of actinobacterial isolates recovered from the different culture media.

| Genera                    | Media |    |    |    |    |    |     |    |    |     |
|---------------------------|-------|----|----|----|----|----|-----|----|----|-----|
|                           | M1    | M2 | M3 | M4 | M5 | M6 | M7  | M8 | M9 | M10 |
| <i>Streptomyces</i>       | 2     | -  | -  | 7  | 10 | 8  | 17  | 18 | 10 | 14  |
| <i>Kitasatospora</i>      | -     | -  | -  | -  | -  | 1  | 1   | 3  | -  | -   |
| <i>Agrococcus</i>         | -     | -  | 2  | 1  | -  | -  | 1   | 1  | -  | 1   |
| <i>Homoserinibacter</i>   | -     | -  | -  | -  | -  | -  | -   | -  | -  | 1   |
| <i>Agromyces</i>          | -     | 4  | 6  | 2  | -  | -  | 24  | 5  | 34 | 2   |
| <i>Curtobacterium</i>     | -     | -  | 3  | -  | 1  | 6  | 6   | -  | 5  | 2   |
| <i>Glutamicibacter</i>    | -     | -  | 1  | -  | -  | 1  | 1   | -  | 2  | 1   |
| <i>Leifsonia</i>          | -     | 2  | 1  | -  | -  | 3  | 3   | 2  | -  | 2   |
| <i>Microbacterium</i>     | -     | 2  | 10 | 14 | 1  | 17 | 12  | 8  | 10 | 4   |
| <i>Schumannella</i>       | -     | -  | -  | -  | -  | -  | -   | -  | -  | 2   |
| <i>Annibacterium</i>      | -     | -  | -  | -  | -  | 1  | -   | -  | -  | -   |
| <i>Frigoribacterium</i>   | -     | -  | 1  | -  | -  | -  | -   | -  | -  | -   |
| <i>Oerskovia</i>          | -     | -  | -  | -  | -  | -  | 1   | -  | -  | -   |
| <i>Brachybacterium</i>    | 3     | 1  | 1  | -  | -  | -  | 1   | -  | -  | 1   |
| <i>Arthrobacter</i>       | -     | 1  | 3  | 1  | 1  | 2  | 2   | 1  | 3  | 1   |
| <i>Micrococcus</i>        | -     | -  | 1  | -  | -  | -  | -   | -  | 1  | -   |
| <i>Paenarthrobacter</i>   | -     | -  | 3  | -  | -  | 2  | 2   | -  | 2  | 2   |
| <i>Kocuria</i>            | -     | -  | 1  | 2  | -  | 1  | 3   | 2  | 1  | -   |
| <i>Sinomonas</i>          | 3     | 2  | 6  | -  | 5  | 5  | 4   | 4  | 9  | 8   |
| <i>Janibacter</i>         | -     | -  | -  | -  | -  | -  | -   | -  | 1  | -   |
| <i>Arsenicococcus</i>     | -     | -  | -  | -  | 1  | -  | -   | -  | -  | 1   |
| <i>Brevibacterium</i>     | -     | -  | -  | -  | -  | 2  | -   | -  | -  | -   |
| <i>Cellulosimicrobium</i> | -     | -  | -  | 1  | -  | -  | 1   | -  | -  | -   |
| <i>Isoptericola</i>       | -     | -  | -  | 3  | -  | -  | 1   | -  | -  | -   |
| <i>Gordonia</i>           | -     | -  | 1  | 1  | -  | -  | -   | -  | -  | -   |
| <i>Nocardia</i>           | -     | 3  | -  | 1  | -  | 1  | 7   | 4  | 2  | 2   |
| <i>Rhodococcus</i>        | 2     | 3  | 13 | 18 | -  | 4  | 12  | 5  | 2  | 5   |
| <i>Mycobacterium</i>      | -     | 4  | 2  | -  | -  | 5  | 4   | 3  | 1  | 9   |
| <i>Nocardiopsis</i>       | -     | -  | -  | 2  | -  | -  | 1   | 2  | 2  | -   |
| <i>Streptosporangium</i>  | -     | -  | -  | -  | 1  | -  | -   | -  | -  | -   |
| <i>Actinomadura</i>       | -     | -  | -  | -  | -  | 1  | -   | -  | -  | -   |
| <i>Micromonospora</i>     | -     | -  | -  | -  | 1  | -  | 1   | -  | -  | -   |
| <i>Modestobacter</i>      | -     | -  | -  | -  | -  | 1  | -   | -  | -  | -   |
| <i>Pseudonocardia</i>     | -     | -  | -  | 1  | -  | -  | -   | -  | -  | -   |
| <i>Nocardioides</i>       | -     | -  | -  | -  | 1  | -  | -   | -  | -  | -   |
| <i>Aeromicrobium</i>      | -     | -  | -  | 3  | -  | -  | -   | -  | -  | -   |
| <i>Microlunatus</i>       | -     | -  | -  | -  | -  | -  | 1   | -  | -  | -   |
| <i>Mycolicibacterium</i>  | -     | -  | -  | -  | -  | -  | 1   | 1  | 1  | 1   |
| <i>Pseudarthrobacter</i>  | -     | 1  | -  | -  | -  | -  | -   | -  | -  | -   |
| Total number of genera    | 4     | 10 | 16 | 14 | 9  | 17 | 23  | 14 | 16 | 18  |
| Total number of isolates  | 10    | 23 | 55 | 57 | 22 | 61 | 107 | 59 | 86 | 59  |

Note: -, no isolate.

Table S4: Antibacterial activity of 54 actinobacterial strains from mangrove soil in Futian and Maowehai.

| Isolates<br>(GenBank<br>accession no.) | Closest type strain (Similarity, %)                                      | Fractions* | Indicator bacteria |   |                          |   |                          |   |                     |      |                    |      |                  |      |      |
|----------------------------------------|--------------------------------------------------------------------------|------------|--------------------|---|--------------------------|---|--------------------------|---|---------------------|------|--------------------|------|------------------|------|------|
|                                        |                                                                          |            | <i>E. coli</i>     |   | <i>P.<br/>aeruginosa</i> |   | <i>K.<br/>pneumoniae</i> |   | <i>A. baumannii</i> |      | <i>E. faecalis</i> |      | <i>S. aureus</i> |      |      |
|                                        |                                                                          |            | S                  | R | S                        | R | S                        | R | S                   | R    | S                  | R    | S                | R    |      |
| 4F1A-3-1<br>(MK589748)                 | <i>Streptomyces antibioticus</i> NBRC 12838 <sup>T</sup> (100 %)         | E          | -                  | - | -                        | - | -                        | - | -                   | 8.3  | -                  | 11.6 | 21.8             | 17.3 | 20.2 |
|                                        |                                                                          | W          | -                  | - | -                        | - | -                        | - | -                   | -    | -                  | 8.8  | 14.2             | 11.4 | 9.4  |
|                                        |                                                                          | M          | -                  | - | -                        | - | -                        | - | -                   | -    | -                  | 16.0 | 21.4             | 17.2 | 16.0 |
| 8J6B-1<br>(MK589749)                   | <i>Streptomyces jiujiangensis</i> JXJ 0074 <sup>T</sup> (99.4 %)         | E          | -                  | - | -                        | - | 18.0                     | - | 9.5                 | 9.2  | -                  | -    | 15.1             | -    |      |
|                                        |                                                                          | W          | -                  | - | -                        | - | -                        | - | -                   | -    | -                  | -    | -                | -    |      |
|                                        |                                                                          | M          | -                  | - | -                        | - | -                        | - | -                   | -    | -                  | -    | -                | -    |      |
| 4F1B-7<br>(MK589747)                   | <i>Streptomyces antibioticus</i> NBRC 12838 <sup>T</sup> (100 %)         | E          | -                  | - | -                        | - | -                        | - | -                   | -    | 13.4               | 19.0 | 16.2             | 20.4 |      |
|                                        |                                                                          | W          | -                  | - | -                        | - | -                        | - | -                   | 8.5  | 7.5                | 15.0 | 12.0             | 13.1 |      |
|                                        |                                                                          | M          | -                  | - | -                        | - | -                        | - | 10.2                | 13.8 | 18.3               | 22.9 | 18.0             | 18.9 |      |
| 9F1A-6<br>(MK589746)                   | <i>Streptomyces zaomyceticus</i> NBRC 13348 <sup>T</sup> (100 %)         | E          | -                  | - | -                        | - | -                        | - | -                   | -    | -                  | -    | -                | -    |      |
|                                        |                                                                          | W          | -                  | - | -                        | - | -                        | - | -                   | -    | -                  | -    | -                | -    |      |
|                                        |                                                                          | M          | -                  | - | -                        | - | -                        | - | -                   | -    | -                  | -    | -                | 23.1 |      |
| 4F1A-4<br>(MK589745)                   | <i>Streptomyces parvulus</i> NBRC 13193 <sup>T</sup> (100 %)             | E          | -                  | - | -                        | - | -                        | - | 9.9                 | 9.9  | 14.3               | 24.5 | 22.0             | -    |      |
|                                        |                                                                          | W          | -                  | - | -                        | - | -                        | - | -                   | -    | -                  | 18.3 | 12.9             | 13.6 |      |
|                                        |                                                                          | M          | -                  | - | -                        | - | -                        | - | 9.6                 | 9.4  | 20.5               | 26.8 | 23.0             | 18.8 |      |
| 5F1A-4<br>(MK589744)                   | <i>Streptomyces antibioticus</i> NBRC 12838 <sup>T</sup> (100 %)         | E          | -                  | - | -                        | - | -                        | - | -                   | -    | 11.5               | 17.7 | 16.7             | 19.3 |      |
|                                        |                                                                          | W          | -                  | - | -                        | - | -                        | - | -                   | -    | 9.4                | 11.9 | 8.4              | 9.1  |      |
|                                        |                                                                          | M          | -                  | - | -                        | - | -                        | - | -                   | -    | 14.7               | 22.7 | 16.4             | 12.8 |      |
| 10X7D-1-3<br>(MK589743)                | <i>Streptomyces angustmyceticus</i> NRRL B-2347 <sup>T</sup><br>(99.9 %) | E          | -                  | - | -                        | - | -                        | - | -                   | -    | -                  | 9.8  | 14.5             | -    |      |
|                                        |                                                                          | W          | 9.8                | - | -                        | - | 10.7                     | - | -                   | -    | 10.0               | -    | 14.9             | 10.7 |      |

|            |                                                                    |   |      |      |   |   |      |      |      |      |     |      |      |      |
|------------|--------------------------------------------------------------------|---|------|------|---|---|------|------|------|------|-----|------|------|------|
|            |                                                                    | M | -    | -    | - | - | 10.0 | -    | -    | -    | 8.3 | -    | 8.8  | 10.0 |
| 7X8A-5     | <i>Streptomyces wuyuanensis</i> CGMCC 4.7042 <sup>T</sup>          | E | -    | -    | - | - | -    | -    | -    | -    | -   | 7.0  | -    | -    |
| (MK589742) | (100 %)                                                            | W | -    | -    | - | - | -    | -    | -    | -    | -   | 11.6 | -    | -    |
|            |                                                                    | M | -    | -    | - | - | -    | -    | -    | -    | -   | -    | -    | -    |
| 7X8A-13    | <i>Streptomyces chattanoogensis</i> NRRL ISP-5002 <sup>T</sup>     | E | 19.4 | 18.8 | - | - | -    | 8.6  | 9.6  | -    | -   | 10.6 | 22.2 | 16.3 |
| (MK589741) | (99.9 %)                                                           | W | -    | 9.3  | - | - | -    | -    | -    | -    | -   | 13.1 | -    | -    |
|            |                                                                    | M | 14.9 | 10.6 | - | - | 11.8 | 16.0 | -    | -    | -   | 9.1  | -    | -    |
| 10F1D-1F   | <i>Streptomyces pratensis</i> ch24 <sup>T</sup> (100 %)            | E | -    | -    | - | - | -    | -    | -    | -    | -   | -    | -    | -    |
| (MK589740) |                                                                    | W | -    | -    | - | - | -    | -    | -    | -    | -   | -    | -    | -    |
|            |                                                                    | M | -    | -    | - | - | -    | -    | -    | -    | -   | -    | 8.4  | -    |
| 4F1A-5     | <i>Streptomyces deserti</i> C63 <sup>T</sup> (98.0 %)              | E | -    | -    | - | - | -    | -    | -    | -    | -   | -    | -    | -    |
| (MK589791) |                                                                    | W | -    | -    | - | - | -    | -    | -    | -    | -   | -    | -    | -    |
|            |                                                                    | M | -    | -    | - | - | -    | -    | -    | -    | 8.0 | 9.0  | 11.3 | -    |
| 10F1D-3    | <i>Streptomyces virginiae</i> NRRL ISP-5094 <sup>T</sup> (100 %)   | E | -    | -    | - | - | -    | -    | -    | -    | -   | -    | -    | -    |
| (MK589738) |                                                                    | W | 15.2 | 16.4 | - | - | 14.3 | 13.4 | 10.6 | 10.9 | -   | 9.7  | -    | -    |
|            |                                                                    | M | 17.7 | 21.3 | - | - | 16.8 | 18.1 | 12.4 | 8.6  | 9.4 | -    | -    | -    |
| 7F1D-2     | <i>Streptomyces zaomyceticus</i> NBRC 13348 <sup>T</sup> (99.9 %)  | E | -    | -    | - | - | -    | -    | -    | -    | -   | -    | -    | -    |
| (MK589737) |                                                                    | W | -    | -    | - | - | -    | -    | -    | -    | -   | -    | -    | -    |
|            |                                                                    | M | -    | -    | - | - | -    | -    | -    | -    | -   | 9.0  | -    | -    |
| 10F1B-6    | <i>Streptomyces amritsarensis</i> MTCC 11845 <sup>T</sup> (100 %)  | E | -    | -    | - | - | -    | -    | -    | -    | -   | -    | -    | -    |
| (MK589736) |                                                                    | W | -    | -    | - | - | -    | -    | -    | -    | -   | -    | -    | -    |
|            |                                                                    | M | -    | -    | - | - | -    | -    | -    | -    | 8.8 | 9.0  | -    | -    |
| 7X8A-6     | <i>Streptomyces sanglieri</i> NBRC 100784 <sup>T</sup> (99.6 %)    | E | -    | -    | - | - | -    | -    | -    | -    | -   | -    | -    | 12.0 |
| (MK589735) |                                                                    | W | -    | -    | - | - | -    | -    | -    | -    | -   | -    | -    | -    |
|            |                                                                    | M | -    | -    | - | - | -    | -    | -    | -    | -   | -    | -    | -    |
| 10F1A-2    | <i>Streptomyces drozdowiczii</i> NBRC 101007 <sup>T</sup> (99.4 %) | E | -    | -    | - | - | -    | -    | -    | -    | -   | -    | 12.8 | -    |





|            |                                                                  |   |      |      |   |   |      |   |   |   |   |      |      |      |
|------------|------------------------------------------------------------------|---|------|------|---|---|------|---|---|---|---|------|------|------|
|            |                                                                  | M | -    | -    | - | - | -    | - | - | - | - | -    | -    | -    |
| 7F1A-7     | <i>Nocardia asteroides</i> NBRC 15531 <sup>T</sup> (99.6 %)      | E | -    | -    | - | - | -    | - | - | - | - | -    | -    | -    |
| (MK589739) |                                                                  | W | 8.9  | -    | - | - | -    | - | - | - | - | -    | -    | -    |
|            |                                                                  | M | -    | -    | - | - | -    | - | - | - | - | -    | -    | -    |
| 8F1A-1-1   | <i>Mycolicibacterium fluoranthenivorans</i> FA-4 <sup>T</sup>    | E | -    | -    | - | - | -    | - | - | - | - | -    | -    | -    |
| (MK589751) | (98.9 %)                                                         | W | 9.0  | -    | - | - | -    | - | - | - | - | -    | -    | -    |
|            |                                                                  | M | -    | -    | - | - | -    | - | - | - | - | -    | -    | -    |
| 10F1D-2    | <i>Mycolicibacterium anyangense</i> QIA-38 <sup>T</sup> (99.2 %) | E | -    | -    | - | - | -    | - | - | - | - | -    | -    | -    |
| (MK589788) |                                                                  | W | -    | -    | - | - | -    | - | - | - | - | 14.0 | -    | -    |
|            |                                                                  | M | -    | -    | - | - | -    | - | - | - | - | -    | -    | -    |
| 4X9B-1     | <i>Gordonia westfalica</i> DSM 44215 <sup>T</sup> (99.8 %)       | E | -    | -    | - | - | -    | - | - | - | - | -    | -    | -    |
| (MK589752) |                                                                  | W | -    | 11.4 | - | - | 11.4 | - | - | - | - | -    | -    | -    |
|            |                                                                  | M | 12.3 | 14.8 | - | - | 9.1  | - | - | - | - | -    | -    | -    |
| 3X8D-4     | <i>Gordonia bronchialis</i> DSM 43247 <sup>T</sup> (100 %)       | E | -    | -    | - | - | -    | - | - | - | - | -    | -    | -    |
| (MK589786) |                                                                  | W | -    | 9.1  | - | - | 12.7 | - | - | - | - | -    | -    | -    |
|            |                                                                  | M | 11.4 | 12.3 | - | - | -    | - | - | - | - | -    | -    | -    |
| s1d5-4     | <i>Micromonospora carbonacea</i> DSM 43168 <sup>T</sup> (100 %)  | E | -    | -    | - | - | 8.6  | - | - | - | - | -    | 10.8 | -    |
| (MK589730) |                                                                  | W | -    | -    | - | - | -    | - | - | - | - | -    | -    | -    |
|            |                                                                  | M | -    | -    | - | - | -    | - | - | - | - | -    | -    | -    |
| 7X9A-12    | <i>Micromonospora citrea</i> DSM 43903 <sup>T</sup> (99.6 %)     | E | -    | -    | - | - | -    | - | - | - | - | -    | -    | -    |
| (MK589777) |                                                                  | W | 16.8 | 11.3 | - | - | -    | - | - | - | - | -    | -    | -    |
|            |                                                                  | M | -    | -    | - | - | -    | - | - | - | - | -    | -    | -    |
| 6X7D-2-2   | <i>Arthrobacter agilis</i> KCTC 3200 <sup>T</sup> (98.7 %)       | E | -    | -    | - | - | -    | - | - | - | - | -    | -    | -    |
| (MK589756) |                                                                  | W | 10.1 | -    | - | - | -    | - | - | - | - | -    | -    | -    |
|            |                                                                  | M | -    | -    | - | - | -    | - | - | - | - | -    | -    | -    |
| s6b7-3a    | <i>Leifsonia shinshuensis</i> JCM 10591 <sup>T</sup> (99.5 %)    | E | -    | -    | - | - | 8.2  | - | - | - | - | -    | 20.3 | 21.2 |

|            |                                                                     |   |      |     |   |     |   |   |   |   |   |     |      |      |
|------------|---------------------------------------------------------------------|---|------|-----|---|-----|---|---|---|---|---|-----|------|------|
| (MK589762) |                                                                     | W | -    | 8.9 | - | -   | - | - | - | - | - | -   | -    | -    |
|            |                                                                     | M | -    | -   | - | -   | - | - | - | - | - | -   | -    | -    |
| 6F1D-2     | <i>Paenarthrobacter ureafaciens</i> DSM 20126 <sup>T</sup>          | E | -    | -   | - | -   | - | - | - | - | - | 9.4 | -    | -    |
| (MK589766) | (99.8 %)                                                            | W | -    | -   | - | -   | - | - | - | - | - | -   | -    | -    |
|            |                                                                     | M | -    | -   | - | -   | - | - | - | - | - | -   | -    | -    |
| s1c8-3b    | <i>Kocuria polaris</i> CMS 76or <sup>T</sup> (100 %)                | E | -    | -   | - | -   | - | - | - | - | - | -   | -    | -    |
| (MK589726) |                                                                     | W | -    | -   | - | 9.8 | - | - | - | - | - | -   | -    | -    |
|            |                                                                     | M | -    | -   | - | -   | - | - | - | - | - | -   | -    | -    |
| 7F1D-1     | <i>Glutamicibacter arilaitensis</i> Re117 <sup>T</sup> (99.2%)      | E | -    | -   | - | -   | - | - | - | - | - | -   | 8.0  | -    |
| (MK589767) |                                                                     | W | -    | -   | - | -   | - | - | - | - | - | -   | -    | -    |
|            |                                                                     | M | -    | -   | - | -   | - | - | - | - | - | -   | -    | -    |
| 6F1D-1     | <i>Kitasatospora psammotica</i> NBRC 13971 <sup>T</sup> (100 %)     | E | -    | -   | - | -   | - | - | - | - | - | -   | -    | -    |
| (MK589787) |                                                                     | W | -    | -   | - | -   | - | - | - | - | - | -   | 12.7 | -    |
|            |                                                                     | M | -    | -   | - | -   | - | - | - | - | - | -   | -    | -    |
| 4X7D-1     | <i>Isoptericola jiangsuensis</i> CLG <sup>T</sup> (99.72 %)         | E | -    | -   | - | -   | - | - | - | - | - | -   | -    | -    |
| (MK589781) |                                                                     | W | 18.4 | 9.9 | - | -   | - | - | - | - | - | -   | -    | -    |
|            |                                                                     | M | -    | -   | - | -   | - | - | - | - | - | -   | -    | -    |
| 3J6B-3     | <i>Micrococcus aloeverae</i> AE-6 <sup>T</sup> (100 %)              | E | -    | -   | - | -   | - | - | - | - | - | -   | -    | -    |
| (MK589759) |                                                                     | W | 10.6 | -   | - | -   | - | - | - | - | - | -   | -    | -    |
|            |                                                                     | M | -    | -   | - | -   | - | - | - | - | - | -   | -    | -    |
| s7b4-1     | <i>Cellulosimicrobium cellulans</i> LMG 16121 <sup>T</sup> (99.0 %) | E | -    | -   | - | -   | - | - | - | - | - | -   | 7.0  | -    |
| (MK589760) |                                                                     | W | -    | -   | - | -   | - | - | - | - | - | -   | -    | 8.0  |
|            |                                                                     | M | -    | -   | - | -   | - | - | - | - | - | -   | -    | -    |
| 2X8D-3     | <i>Pseudarthrobacter niigatensis</i> LC4 <sup>T</sup> (100 %)       | E | -    | -   | - | -   | - | - | - | - | - | -   | -    | -    |
| (MK589769) |                                                                     | W | -    | -   | - | -   | - | - | - | - | - | -   | -    | -    |
|            |                                                                     | M | -    | -   | - | -   | - | - | - | - | - | -   | 12.6 | 14.8 |

|                         |                                                                     |              |      |      |      |     |      |      |      |      |      |      |      |      |      |
|-------------------------|---------------------------------------------------------------------|--------------|------|------|------|-----|------|------|------|------|------|------|------|------|------|
| 10F1B-8-1<br>(MK589789) | <i>Homoserinibacter gongjuensis</i> 5GH26-15 <sup>T</sup> (97.7 %)  | E            | -    | -    | -    | -   | -    | -    | -    | -    | -    | -    | -    | -    |      |
|                         |                                                                     | W            | 9.4  | 10.6 | -    | -   | -    | -    | -    | -    | -    | -    | -    | -    | 18.8 |
|                         |                                                                     | M            | -    | -    | -    | -   | -    | -    | -    | -    | -    | -    | -    | -    | -    |
| 6J6B-5<br>(MK589780)    | <i>Annibacterium kyonggiense</i> KSL51201-037 <sup>T</sup> (99.4 %) | E            | -    | -    | -    | -   | -    | -    | -    | -    | -    | -    | 9.4  | -    |      |
|                         |                                                                     | W            | 8.4  | -    | -    | -   | -    | -    | -    | -    | -    | -    | -    | -    | -    |
|                         |                                                                     | M            | -    | -    | -    | -   | -    | -    | -    | -    | -    | -    | -    | -    | -    |
| s7c6-2a<br>(MK589776)   | <i>Actinomadura maheshkhaliensis</i> 13-12-50 <sup>T</sup> (100 %)  | E            | -    | -    | -    | -   | -    | -    | -    | -    | -    | -    | 13.3 | -    |      |
|                         |                                                                     | W            | -    | -    | -    | -   | -    | -    | -    | -    | -    | -    | -    | -    | -    |
|                         |                                                                     | M            | -    | -    | -    | -   | -    | -    | -    | -    | -    | -    | -    | -    | -    |
| 4F1A-3<br>(MK589774)    | <i>Pseudonocardia carboxydivorans</i> Y8 <sup>T</sup> (100 %)       | E            | -    | -    | -    | -   | -    | -    | -    | -    | -    | -    | 9.5  | 9.8  |      |
|                         |                                                                     | W            | 11.7 | -    | -    | -   | 8.5  | -    | -    | -    | -    | -    | 10.2 | -    |      |
|                         |                                                                     | M            | -    | -    | -    | -   | -    | -    | -    | -    | -    | -    | -    | -    | -    |
|                         |                                                                     | methanol     | -    | -    | -    | -   | -    | -    | -    | -    | -    | -    | -    | -    | -    |
|                         |                                                                     | levofloxacin | 26.1 | 24.5 | 12.8 | 9.8 | 26.8 | 14.0 | 19.0 | 15.0 | 12.6 | 10.4 | 19.3 | 15.5 |      |

Note: Diameter of the inhibitory zone: mm; -, no inhibitory activity.

\* E: Sample from ethyl acetate layer; W: Sample from water layer; M: Sample from mycelium.

S: Sensitive strains; R: Drug-resistant strains.
